# Supplementary material
Source: Springer Nature journal article supplement (https://www.springermedizin.de/resource/supplementary/13058_2004_956_MOESM5_ESM.pdf/9705726)

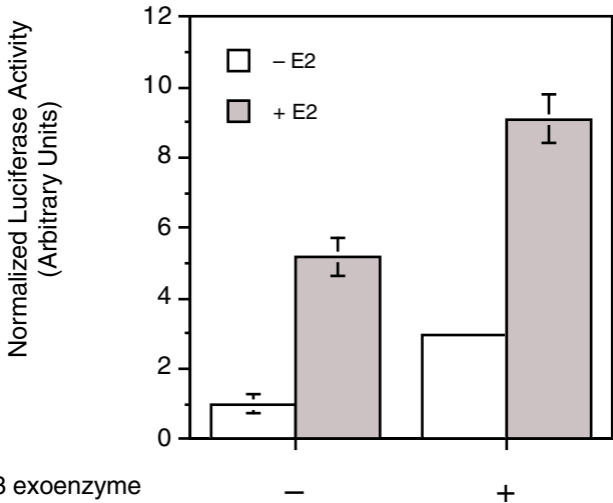

Supplement: MOESM5 [file 9705726]
